# Supplementary material for: A new enantiopure unsaturated dicarboxylate as a 4-connected unit in a flexible homochiral PtS-type framework
Source: Royal Society of Chemistry journal article supplement (doi:10.1039/b719368h), 2008-01-01
Supplement: b719368h.pdf [file b719368h.pdf]

## Supporting Information

A New Enantiopure Unsaturated Dicarboxylate as 4-Connected Unit in Flexible Homochiral  
PtS-type Frameworks

Jian Zhang and Xianhui Bu\*

Department of Chemistry and Biochemistry, California State University, Long Beach, 1250  
Bellflower Boulevard, Long Beach, CA 90840 E-mail: xbu@csulb.edu

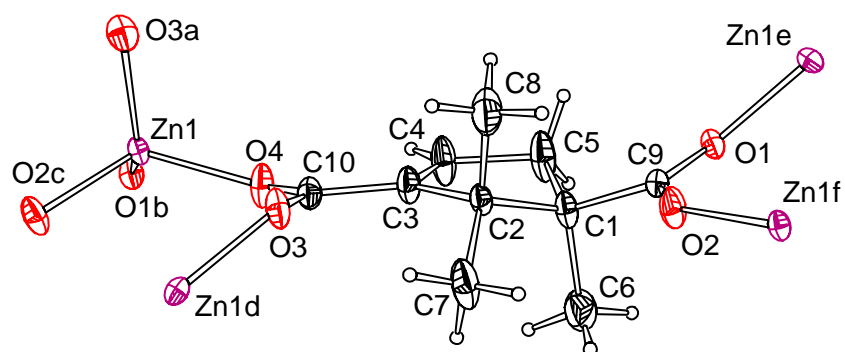

**Figure S1.** A view of 1 with 30% probability displacement ellipsoids; H atoms are shown as small spheres of arbitrary radii. (Symmetry codes: a =  $1/2-y, -1/2+x, -1/4+z$ ; b =  $3/2-x, -1/2+y, -1/4-z$ ; c =  $y, -1+x, -z$ ; d =  $1/2y, 1/2-x, 1/4+z$ ; e =  $3/2-x, 1/2+y, -1/4-z$ ; f =  $1+y, x, -z$ ).

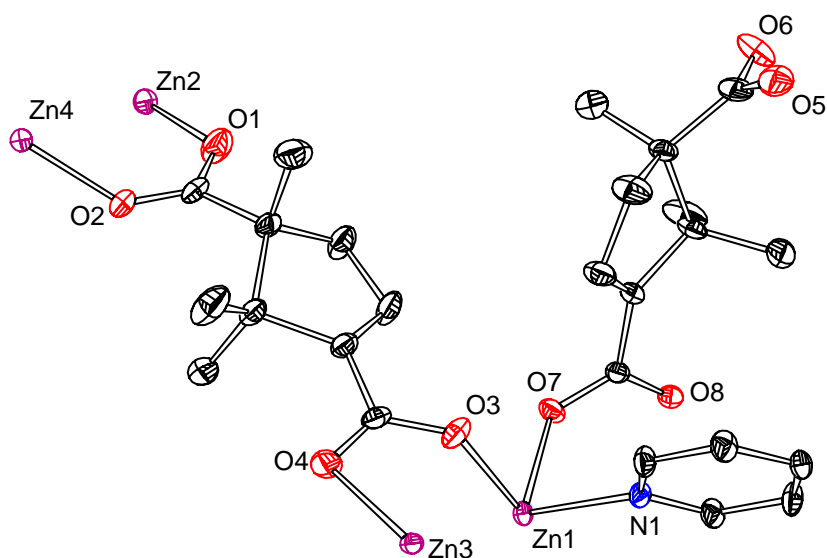

**Figure S2.** A view of the asymmetry unit of 2 with 30% probability displacement ellipsoids.

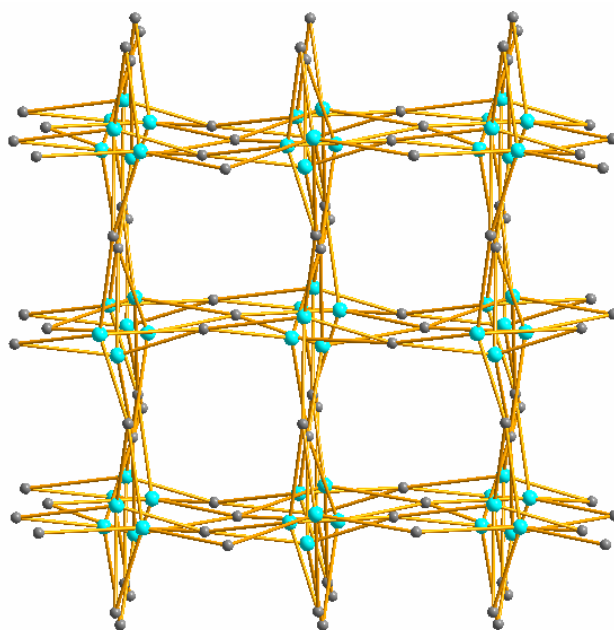

**Figure S3.** View of the distorted pts topological net of **1**. The tced ligands are reduced as planar 4-connected nodes (dark) and the Zn atoms are reduced as tetrahedral nodes (sky blue).

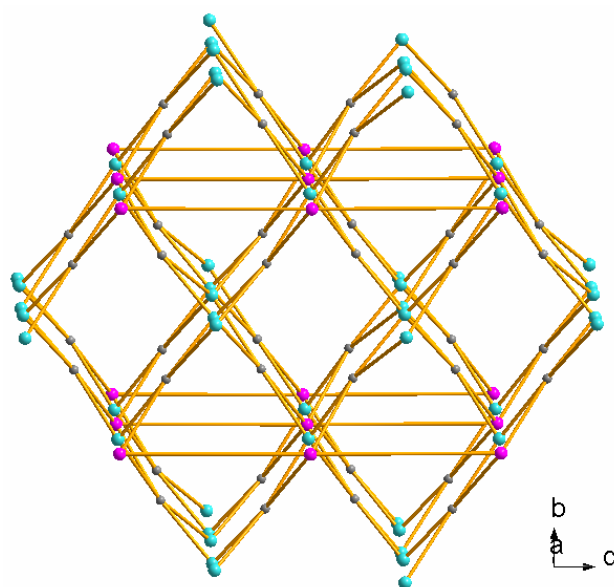

**Figure S4.** View of the (4,6)-connected topological net of **2**. The tced ligands are reduced as planar 4-connected nodes (dark) and the Zn atoms are reduced as tetrahedral nodes (sky blue) and octahedral nodes (purple).

**Thermal Analysis** The simultaneous DSC-TGA thermal analysis was performed on TA Instruments SDT Q600 under the flowing nitrogen atmosphere. The flow rate of the nitrogen gas was controlled at about 100 mL per minute.

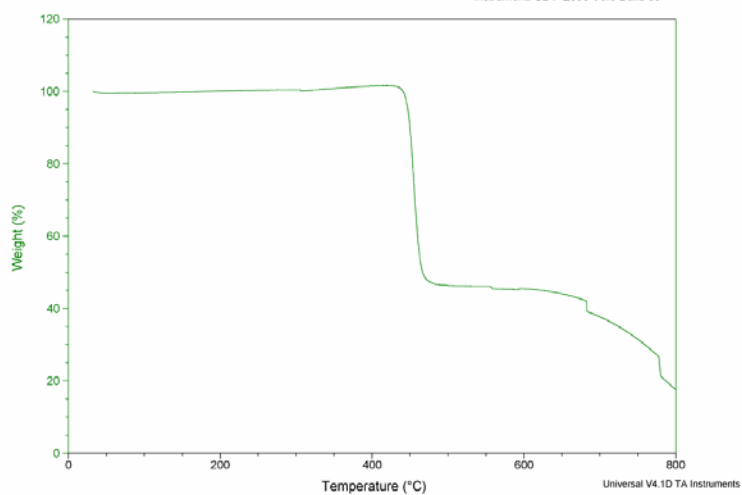

**Figure S5.** The TGA diagram of **1**.

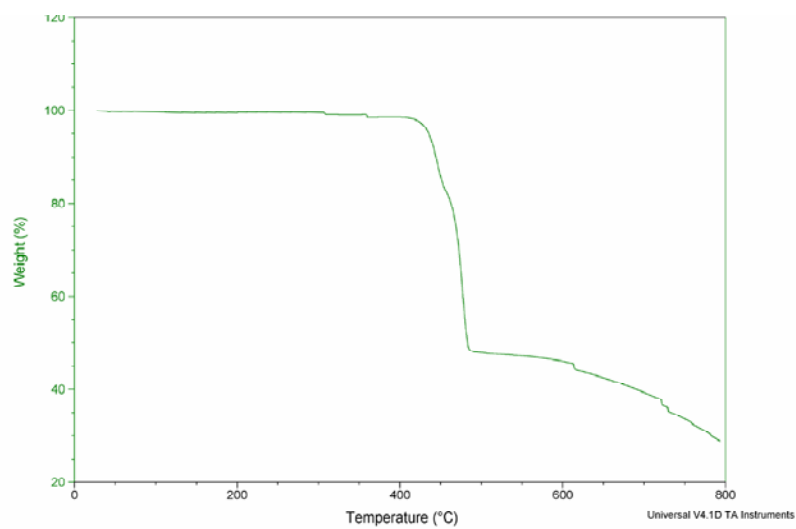

**Figure S6.** The TGA diagram of **2**.

**X-ray Powder Diffraction** X-ray powder diffraction experiments were performed on a Bruker D8 Advance X-ray powder diffractometer operating at 40kV and 40mA (CuK $\alpha$  radiation,  $\lambda = 1.5418\text{\AA}$ ). The data collection was carried out with a step size of 0.03 degree and counting time of 1s per step. The 2-theta angular range is from 5 to 40 degrees.

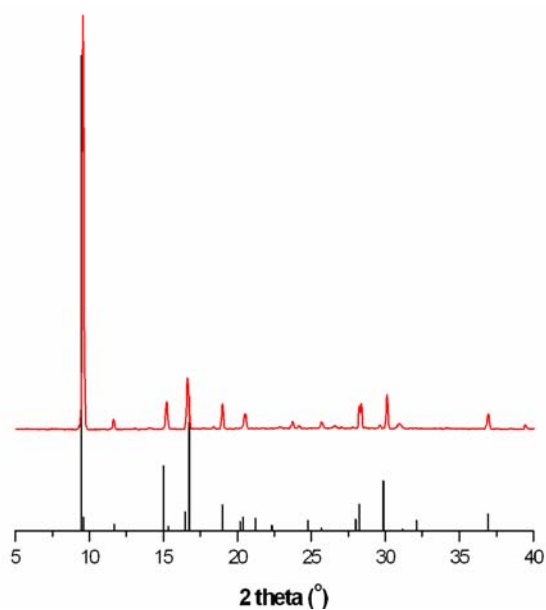

**Figure S7.** XPRD patterns for 1: (bottom) calculated on the basis of the structure determined by single-crystal X-ray diffraction; (top) taken at room temperature.

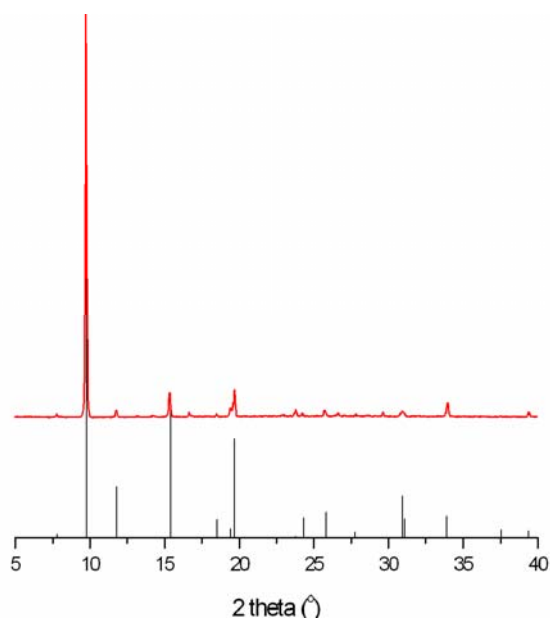

**Figure S8.** XPRD patterns for 2: (bottom) calculated on the basis of the structure determined by single-crystal X-ray diffraction; (top) taken at room temperature.
